# Supplementary material for: Training time minimization for federated edge learning with optimized gradient quantization and bandwidth allocation
Source: Springer Nature journal article supplement (doi:10.1631/fitee.2100538), 2022-08-01
Supplement: 11714_2022_1846_MOESM1_ESM.pdf [file 11714_2022_1846_MOESM1_ESM.pdf]

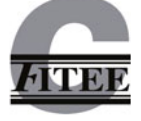

## Supplementary materials for

Peixi LIU, Jiamo JIANG, Guangxu ZHU, Lei CHENG, Wei JIANG, Wu LUO, Ying DU, Zhiqin WANG, 2022. Training time minimization for federated edge learning with optimized gradient quantization and bandwidth allocation. *Front Inform Technol Electron Eng*, 23(8):1247-1263. <https://doi.org/10.1631/FITEE.2100538>

### Proof S1 Proof of Theorem 1

We first give one necessary lemma before proving Theorem 1, and also provide the proof of this lemma after the proof of Theorem 1.

**Lemma S1** Under the same conditions as in Theorem 1, we have

$$\mathbb{E} \left[ \left\| \mathbf{w}^{(n+1)} - \mathbf{w}_* \right\|^2 \right] \leq (1 - \mu\eta_n) \mathbb{E} \left[ \left\| \mathbf{w}^{(n)} - \mathbf{w}_* \right\|^2 \right] + \alpha\Gamma\eta_n^2,$$

where  $\Gamma = 2LF_\delta + \frac{1}{K} \sum_{k=1}^K \delta_k^2$ .

**Proof** The proof is provided later in this section.

Next, with Lemma S1 and decaying learning rate  $\eta_n = \frac{\beta}{\gamma+n}$ , we prove that  $\mathbb{E} \left[ \left\| \mathbf{w}^{(n)} - \mathbf{w}_* \right\|^2 \right] \leq \frac{\nu}{\gamma+n}$  by induction, where

$$\nu = \max \left\{ (\gamma + 1) \left\| \mathbf{w}_0 - \mathbf{w}_* \right\|^2, \frac{\alpha\Gamma\beta^2}{\mu\beta - 1} \right\}.$$

First, it holds for  $n = 1$  by the definition of  $\nu$ . Then, assuming that it holds for some  $n > 1$ , it follows from Lemma S1 that

$$\mathbb{E} \left[ \left\| \mathbf{w}^{(n+1)} - \mathbf{w}_* \right\|^2 \right] \leq \frac{(\gamma + n - \mu\beta)\nu}{(\gamma + n)^2} + \frac{\alpha\Gamma\beta^2}{(\gamma + n)^2} = \frac{(\gamma + n - 1)\nu}{(\gamma + n)^2} + \frac{\alpha\Gamma\beta^2 - (\mu\beta - 1)\nu}{(\gamma + n)^2}.$$

By the definition of  $\nu$ , we have  $\alpha\Gamma\beta^2 - (\mu\beta - 1)\nu \leq 0$ . Then, it follows that

$$\mathbb{E} \left[ \left\| \mathbf{w}^{(n+1)} - \mathbf{w}_* \right\|^2 \right] \leq \frac{(\gamma + n - 1)\nu}{(\gamma + n)^2} \leq \frac{\nu}{\gamma + n + 1}.$$

Specifically, we choose  $\beta = \frac{2}{\mu}$  and  $\gamma = \frac{2\alpha L}{\mu} - 1$ . Using  $\max\{x, y\} \leq x + y$ , we have  $\nu \leq \frac{2\alpha L}{\mu} \left\| \mathbf{w}_0 - \mathbf{w}_* \right\|^2 + \frac{4\alpha\Gamma}{\mu^2}$ . Therefore, we have

$$\mathbb{E} \left[ \left\| \mathbf{w}^{(n)} - \mathbf{w}_* \right\|^2 \right] \leq \frac{\alpha/\mu}{n + 2\alpha L/\mu - 1} \left( 2L \left\| \mathbf{w}_0 - \mathbf{w}_* \right\|^2 + \frac{4\Gamma}{\mu} \right).$$

Then, by the  $L$ -smoothness of  $F(\mathbf{w})$ , it holds that

$$\mathbb{E} \left[ F \left( \mathbf{w}^{(n)} \right) \right] - F(\mathbf{w}_*) \leq \frac{L}{2} \mathbb{E} \left[ \left\| \mathbf{w}^{(n)} - \mathbf{w}_* \right\|^2 \right].$$

It follows that

$$\mathbb{E} \left[ F \left( \mathbf{w}^{(n)} \right) \right] - F(\mathbf{w}_*) \leq \frac{\alpha L/\mu}{n + 2\alpha L/\mu - 1} \left( L \left\| \mathbf{w}_0 - \mathbf{w}_* \right\|^2 + \frac{2\Gamma}{\mu} \right).$$

We complete the proof of Theorem 1 by setting  $n = N$ .

**Proof** Proof of Lemma S1 is as follows:

Notice that  $\mathbf{w}^{(n+1)} = \mathbf{w}^{(n)} - \frac{\eta_n}{K} \sum_{k=1}^K \mathcal{Q}(\mathbf{g}_k^{(n)})$ . Then we have

$$\left\| \mathbf{w}^{(n+1)} - \mathbf{w}_* \right\|^2 = \left\| \mathbf{w}^{(n)} - \frac{\eta_n}{K} \sum_{k=1}^K \mathcal{Q}(\mathbf{g}_k^{(n)}) - \mathbf{w}_* \right\|^2 = \|\mathbf{a}_1 - \mathbf{a}_2\|^2 = \|\mathbf{a}_1\|^2 + \|\mathbf{a}_2\|^2 - 2 \langle \mathbf{a}_1, \mathbf{a}_2 \rangle,$$

where  $\mathbf{a}_1 = \mathbf{w}^{(n)} - \mathbf{w}_* - \frac{\eta_n}{K} \sum_{k=1}^K \mathbf{g}_k^{(n)}$  and  $\mathbf{a}_2 = \frac{\eta_n}{K} \sum_{k=1}^K (\mathcal{Q}(\mathbf{g}_k^{(n)}) - \mathbf{g}_k^{(n)})$ . Due to  $\mathbb{E}_{\mathcal{Q}}[\mathcal{Q}(\mathbf{g}_k^{(n)})] = \mathbf{g}_k^{(n)}$ , we have  $\mathbb{E}_{\mathcal{Q}}[\langle \mathbf{a}_1, \mathbf{a}_2 \rangle] = 0$ , which leads to

$$\left\| \mathbf{w}^{(n+1)} - \mathbf{w}_* \right\|^2 = \|\mathbf{a}_1\|^2 + \|\mathbf{a}_2\|^2. \quad (\text{S1})$$

Next, we first obtain the upper bounds of  $A_1$  and  $A_2$ ; taking these bounds into Eq. (S1), then we find the connection between  $\left\| \mathbf{w}^{(n+1)} - \mathbf{w}_* \right\|^2$  and  $\left\| \mathbf{w}^{(n)} - \mathbf{w}_* \right\|^2$  after some proper manipulations.

1. Bound of  $\|\mathbf{a}_1\|^2$ : To bound  $\|\mathbf{a}_1\|^2$ , we break  $\|\mathbf{a}_1\|^2$  as

$$\|\mathbf{a}_1\|^2 = \left\| \mathbf{w}^{(n)} - \mathbf{w}_* - \frac{\eta_n}{K} \sum_{k=1}^K \mathbf{g}_k^{(n)} \right\|^2 = \left\| \mathbf{w}^{(n)} - \mathbf{w}_* \right\|^2 + \underbrace{\left\| \frac{\eta_n}{K} \sum_{k=1}^K \mathbf{g}_k^{(n)} \right\|^2}_{B_1} + 2 \underbrace{\left\langle \mathbf{w}_* - \mathbf{w}^{(n)}, \frac{\eta_n}{K} \sum_{k=1}^K \mathbf{g}_k^{(n)} \right\rangle}_{B_2}.$$

To bound  $B_1$ , we use  $\left\| \sum_{k=1}^K \mathbf{a}_k \right\|^2 \leq K \sum_{k=1}^K \|\mathbf{a}_k\|^2$ . This gives

$$B_1 \leq \frac{\eta_n^2}{K} \sum_{k=1}^K \left\| \mathbf{g}_k^{(n)} \right\|^2.$$

By the  $\mu$ -strong convexity of  $F_k(\mathbf{w})$ , it follows that

$$\left\langle \mathbf{w}_* - \mathbf{w}^{(n)}, \mathbf{g}_k^{(n)} \right\rangle \leq F_k(\mathbf{w}_*) - F_k(\mathbf{w}^{(n)}) - \frac{\mu}{2} \left\| \mathbf{w}^{(n)} - \mathbf{w}_* \right\|^2.$$

Hence,  $B_2$  can be bounded by

$$B_2 \leq 2 \frac{\eta_n}{K} \sum_{k=1}^K \left( F_k(\mathbf{w}_*) - F_k(\mathbf{w}^{(n)}) \right) - \mu \eta_n \left\| \mathbf{w}^{(n)} - \mathbf{w}_* \right\|^2.$$

2. Bound of  $\|\mathbf{a}_2\|^2$ : Since  $\mathbf{g}_k^{(n)}$ 's are independent and  $\mathbb{E}_{\mathcal{Q}} \left[ \left\| \mathcal{Q}(\mathbf{g}_k^{(n)}) - \mathbf{g}_k^{(n)} \right\|^2 \right] \leq \frac{\sqrt{d}}{q} \left\| \mathbf{g}_k^{(n)} \right\|^2$  holds, it follows that

$$\mathbb{E}_{\mathcal{Q}} \left[ \|\mathbf{a}_2\|^2 \right] \leq \frac{\sqrt{d} \eta_n^2}{q K^2} \sum_{k=1}^K \left\| \mathbf{g}_k^{(n)} \right\|^2.$$

With these bounds at hand, and taking expectation of Eq. (S1) over the stochastic quantizer  $\mathcal{Q}$  and stochastic gradient at round  $n$ , we have

$$\mathbb{E} \left[ \left\| \mathbf{w}^{(n+1)} - \mathbf{w}_* \right\|^2 \right] \leq (1 - \mu \eta_n) \left\| \mathbf{w}^{(n)} - \mathbf{w}_* \right\|^2 + 2 \frac{\eta_n}{K} \sum_{k=1}^K \left( F_k(\mathbf{w}_*) - F_k(\mathbf{w}^{(n)}) \right) + \frac{\alpha \eta_n^2}{K} \sum_{k=1}^K \mathbb{E} \left\| \mathbf{g}_k^{(n)} \right\|^2. \quad (\text{S2})$$

Recall that  $\alpha = \frac{\sqrt{d}}{qK} + 1$ . From Assumption 3, we have

$$\mathbb{E} \left\| \mathbf{g}_k^{(n)} \right\|^2 \leq \delta_k^2 + \left\| \nabla F_k(\mathbf{w}^{(n)}) \right\|^2. \quad (\text{S3})$$

Substituting inequality (S3) into inequality (S2) yields

$$\begin{aligned} \mathbb{E} \left[ \left\| \mathbf{w}^{(n+1)} - \mathbf{w}_* \right\|^2 \right] &\leq (1 - \mu\eta_n) \left\| \mathbf{w}^{(n)} - \mathbf{w}_* \right\|^2 + 2\frac{\eta_n}{K} \sum_{k=1}^K \left( F_k(\mathbf{w}_*) - F_k(\mathbf{w}^{(n)}) \right) \\ &\quad + \frac{\alpha\eta_n^2}{K} \sum_{k=1}^K \left( \delta_k^2 + \left\| \nabla F_k(\mathbf{w}^{(n)}) \right\|^2 \right). \end{aligned}$$

The  $L$ -smoothness of  $F_k(\mathbf{w})$  gives

$$\left\| \nabla F_k(\mathbf{w}^{(n)}) \right\|^2 \leq 2L \left( F_k(\mathbf{w}^{(n)}) - F_k^* \right).$$

It follows that

$$\begin{aligned} \mathbb{E} \left[ \left\| \mathbf{w}^{(n+1)} - \mathbf{w}_* \right\|^2 \right] &\leq (1 - \mu\eta_n) \left\| \mathbf{w}^{(n)} - \mathbf{w}_* \right\|^2 + \frac{\alpha\eta_n^2}{K} \sum_{k=1}^K \delta_k^2 \\ &\quad + \underbrace{2\frac{\eta_n}{K} \sum_{k=1}^K \left( F_k(\mathbf{w}_*) - F_k(\mathbf{w}^{(n)}) \right)}_{C_1} + \underbrace{\frac{2L\eta_n^2\alpha}{K} \sum_{k=1}^K \left( F_k(\mathbf{w}^{(n)}) - F_k^* \right)}_{C_2}. \end{aligned}$$

After rearranging  $C_1 + C_2$ , we have

$$C_1 + C_2 = 2\eta_n (\alpha L\eta_n - 1) \left( F(\mathbf{w}^{(n)}) - F(\mathbf{w}_*) \right) + 2\alpha L\eta_n^2 F_\delta,$$

where  $F_\delta := F(\mathbf{w}_*) - \frac{1}{K} \sum_{k=1}^K F_k^*$ .

It can be verified that  $\eta_n \leq \frac{1}{\alpha L}$ , and from  $F(\mathbf{w}^{(n)}) \geq F(\mathbf{w}_*)$ , we have

$$C_1 \leq 2\alpha L\eta_n^2 F_\delta.$$

Taking the total expectation of Eq. (S1) yields

$$\mathbb{E} \left[ \left\| \mathbf{w}^{(n+1)} - \mathbf{w}_* \right\|^2 \right] \leq (1 - \mu\eta_n) \mathbb{E} \left[ \left\| \mathbf{w}^{(n)} - \mathbf{w}_* \right\|^2 \right] + \alpha\eta_n^2 \left( 2LF_\delta + \frac{1}{K} \sum_{k=1}^K \delta_k^2 \right),$$

which completes the proof.

## Proof S2 Proof of Lemma 1

If  $T_k^{\text{comp}} + T_k^{\text{comm}} < T_d, \forall k \in [K]$ ,  $T_d$  can be reduced until  $k \in [K]$  satisfies  $T_k^{\text{comp}} + T_k^{\text{comm}} = T_d$ . Denote  $\mathcal{K} = \{k \in [K] | T_k^{\text{comp}} + T_k^{\text{comm}} < T_d\}$  and  $\bar{\mathcal{K}} = \{k \in [K] | T_k^{\text{comp}} + T_k^{\text{comm}} = T_d\}$ . Obviously,  $\mathcal{K} + \bar{\mathcal{K}} = [K]$ . Since  $T_k^{\text{comm}}$  is an decreasing function of  $b_k$ , we can enforce  $T_k^{\text{comp}} + T_k^{\text{comm}} = T_d$  by decreasing  $b_k$  for all  $k \in \mathcal{K}$ . Then,  $\mathcal{K} = \emptyset$  and  $\bar{\mathcal{K}} = [K]$ . In this case, if  $\sum_{k=1}^K b_k < B_0$ , we can properly increase each  $b_k$ , without violating  $T_k^{\text{comp}} + T_k^{\text{comm}} = T_d, k \in [K]$ , until  $\sum_{k=1}^K b_k = B_0$ , and  $T_d$  will decrease as well.

Table S1 Simulation parameters

| Parameter                                     | Value                                                         |
|-----------------------------------------------|---------------------------------------------------------------|
| Number of edge devices ( $K$ )                | 6                                                             |
| Transmit power of edge devices ( $p_k$ )      | 1 dBm                                                         |
| CPU frequency ( $f_k$ )                       | 100 MHz–1 GHz                                                 |
| Number of CPU cycles for one batch ( $\nu$ )  | $10^8$ (simulation 1);<br>$2.5 \times 10^{10}$ (simulation 2) |
| Variance of shadow fading ( $\sigma_\eta^2$ ) | 8 dB                                                          |
| Noise power spectral density ( $N_0$ )        | -174 dBm/Hz                                                   |
| Total bandwidth ( $B_0$ )                     | 10 kHz                                                        |

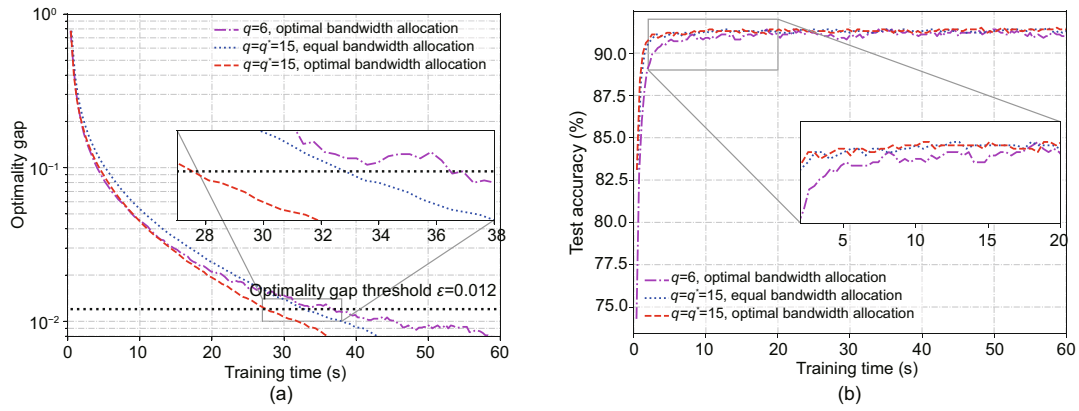

Fig. S1 Optimality gap (a) and test accuracy (b) in simulation 1

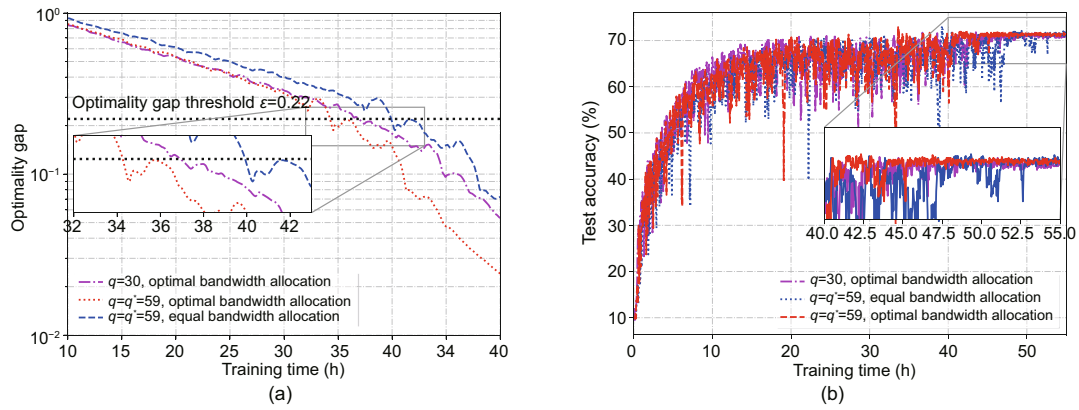

Fig. S2 Optimality gap (a) and test accuracy (b) in simulation 2
